# Supplementary material
Source: publisher site journal article supplement (https://www.spandidos-publications.com/3402/downloadSupplementary)

Figure S1. Overall survival rates based on MMP1, BUB1, KIAA0101 and SRD5A1 expression in lung cancer were determined by Kaplan-Meier analysis using the online software UALCAN. BUB1, BUB1 mitotic checkpoint serine/threonine kinase; KIAA0101, PCNA clamp associated factor; SRD5A1, steroid 5  $\alpha$ -reductase 1.

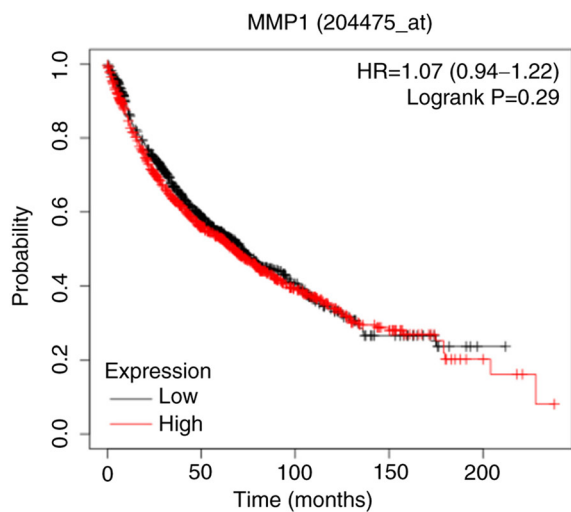

| Number at risk |     | 0   | 50  | 100 | 150 | 200 |
|----------------|-----|-----|-----|-----|-----|-----|
| Low            | 963 | 413 | 89  | 20  | 1   |     |
| High           | 962 | 414 | 114 | 37  | 6   |     |

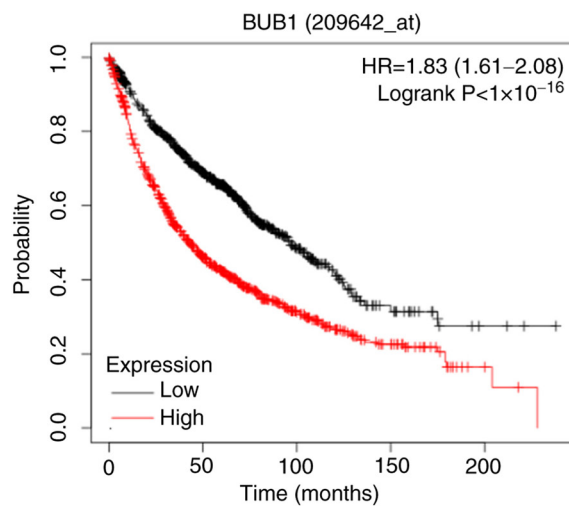

| Number at risk |     | 0   | 50  | 100 | 150 | 200 |
|----------------|-----|-----|-----|-----|-----|-----|
| Low            | 963 | 481 | 96  | 20  | 3   |     |
| High           | 962 | 346 | 107 | 37  | 4   |     |

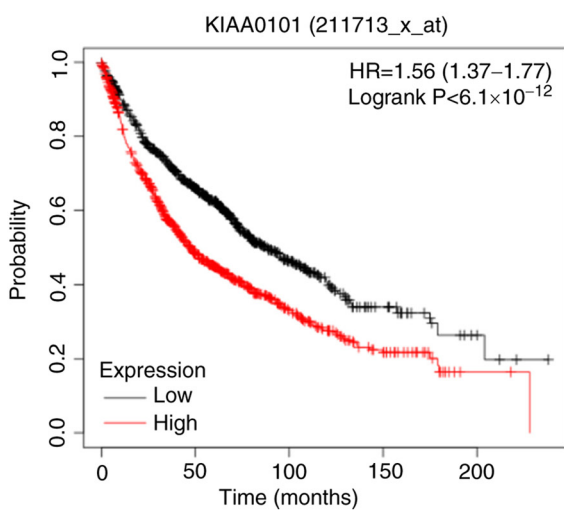

| Number at risk |     | 0   | 50  | 100 | 150 | 200 |
|----------------|-----|-----|-----|-----|-----|-----|
| Low            | 966 | 492 | 107 | 25  | 5   |     |
| High           | 959 | 335 | 96  | 32  | 2   |     |

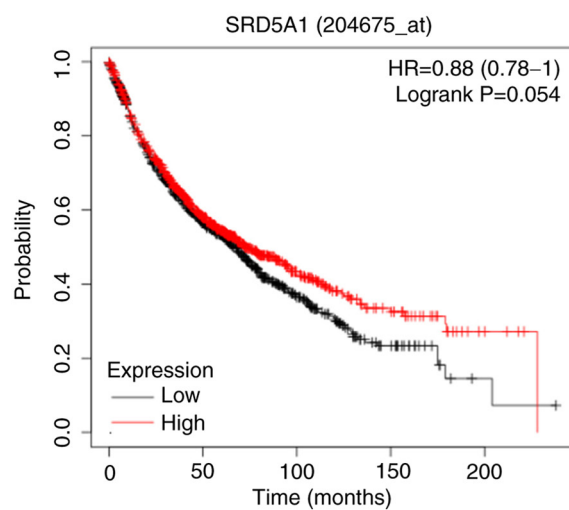

| Number at risk |     | 0   | 50  | 100 | 150 | 200 |
|----------------|-----|-----|-----|-----|-----|-----|
| Low            | 963 | 405 | 102 | 23  | 2   |     |
| High           | 962 | 422 | 101 | 34  | 5   |     |

Figure S2. Effect of circTADA2A and miR-638 on KIAA0101 protein expression. Overexpression of circTADA2A promotes KIAA0101 protein expression, while the promotive effect is reversed by upregulation of miR-638 in A549 and H1299 cells. \* $P < 0.05$ , \*\* $P < 0.01$ . circTADA2A, circular RNA transcription adaptor 2A; miR, microRNA; KIAA0101, PCNA clamp associated factor; oe, overexpression.

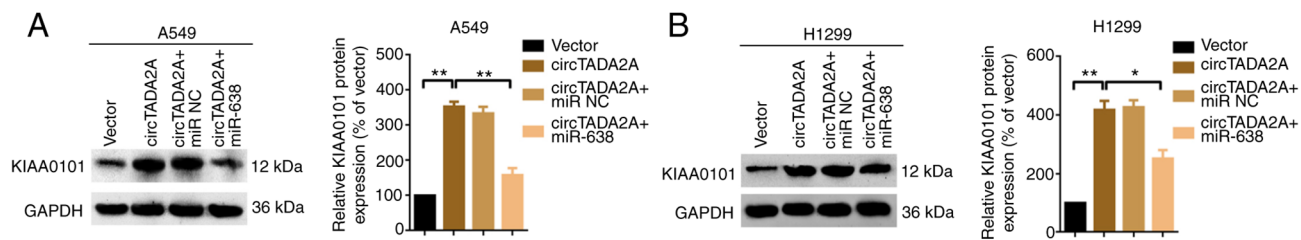

Supplement: Supplementary file 1 [file downloadSupplementary]
